# Supplementary material
Source: PubMed Central journal article supplement (PMC5166539)
Supplement: jcav07p2290s1.pdf [file jcav07p2290s1.pdf]

## Supplementary file

---

### S1. Risk factors for developing small bowel adenocarcinoma.

|                                                  |               |
|--------------------------------------------------|---------------|
| Positive family history (first degree relatives) | 60/109 (55%)  |
| Small bowel tumor                                | 1/109 (1%)    |
| Colorectal tumor                                 | 21/109 (19%)  |
| Endometrium                                      | 1/109 (1%)    |
| Kidney, Bladder, Ureter                          | 5/109 (5%)    |
| Breast                                           | 13/109 (12%)  |
| Prostate                                         | 8/109 (8%)    |
| Lung                                             | 7/109 (6%)    |
| Lymphoma, hematological tumors                   | 6/109 (6%)    |
| Others                                           | 22/109 (20%)  |
| Lynch-Syndrome (Amsterdam II criteria)           | 6/109 (6%)    |
| Peutz-Jeghers-Syndrome                           | 1/109 (1%)    |
| Simultaneous/sequential tumors                   | 43/148 (29%)  |
| Simultaneous                                     | 12/148 (8%)   |
| Sequential                                       | 35/148 (24%)  |
| M. Crohn                                         | 18/144 (13%)  |
| Duodenum                                         | 1/144 (0.7%)  |
| Jejunum                                          | 4/144 (2.8%)  |
| Ileum                                            | 13/144 (9.0%) |

## S2. Leading symptoms at diagnosis (n=150)

|          | Abdominal discomfort | Gastrointestinal bleeding, chron. iron deficiency | Jaundice | Nausea, emesis | Other symptoms, asymptomatic |
|----------|----------------------|---------------------------------------------------|----------|----------------|------------------------------|
| Duodenum | 16                   | 21                                                | 3        | 24             | 8                            |
| Jejunum  | 18                   | 12                                                | 0        | 8              | 8                            |
| Ileum    | 15                   | 6                                                 | 0        | 9              | 2                            |
| In total | 49 (33%)             | 39 (26%)                                          | 3 (2%)   | 41 (27%)       | 18 (12%)                     |

**S3. Kaplan-Meier curves of the disease-free-survival for patients treated with or without adjuvant chemotherapy.**

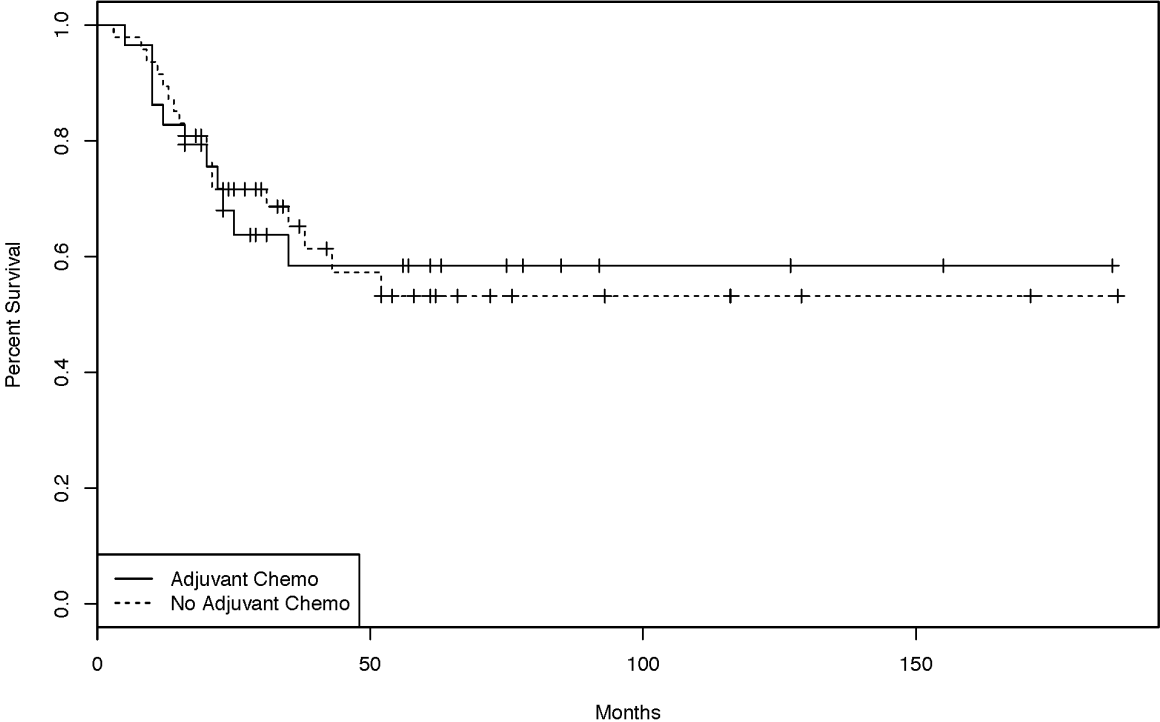

47 patients treated in curative intent without adjuvant chemotherapy, 29 patients treated in a curative intent with adjuvant chemotherapy. (log rank test:  $p = 1.00$ )
